# Supplementary material for: Application of low-intensity pulsed therapeutic ultrasound on mesenchymal precursors does not affect their cell properties
Source: PubMed Central journal article supplement (PMC7877602; doi:10.1371/journal.pone.0246261), 2021-02-11
Supplement: pone.0246261.s003.pdf [file pone.0246261.s003.pdf]

# LAMININ WB (used in Figure 8 B)

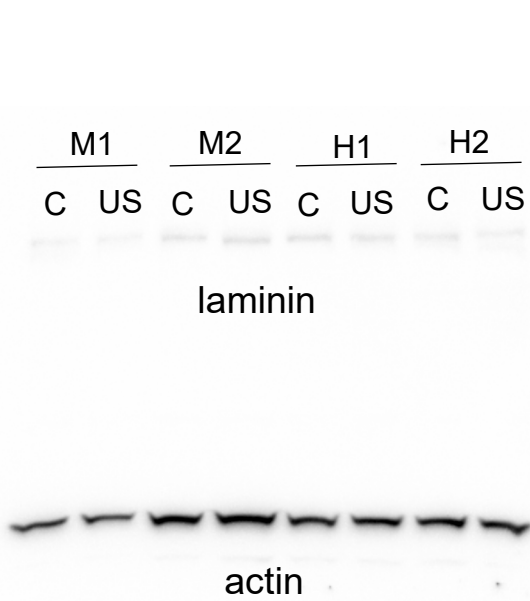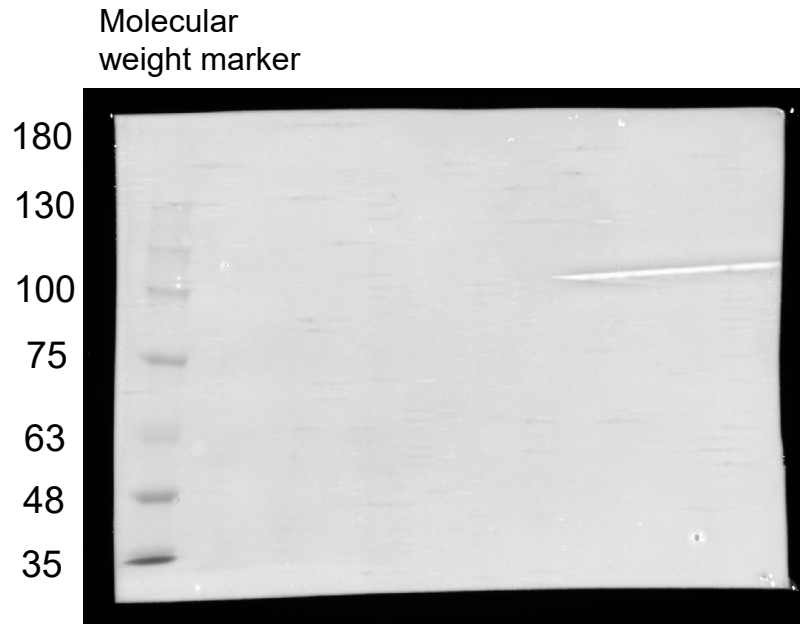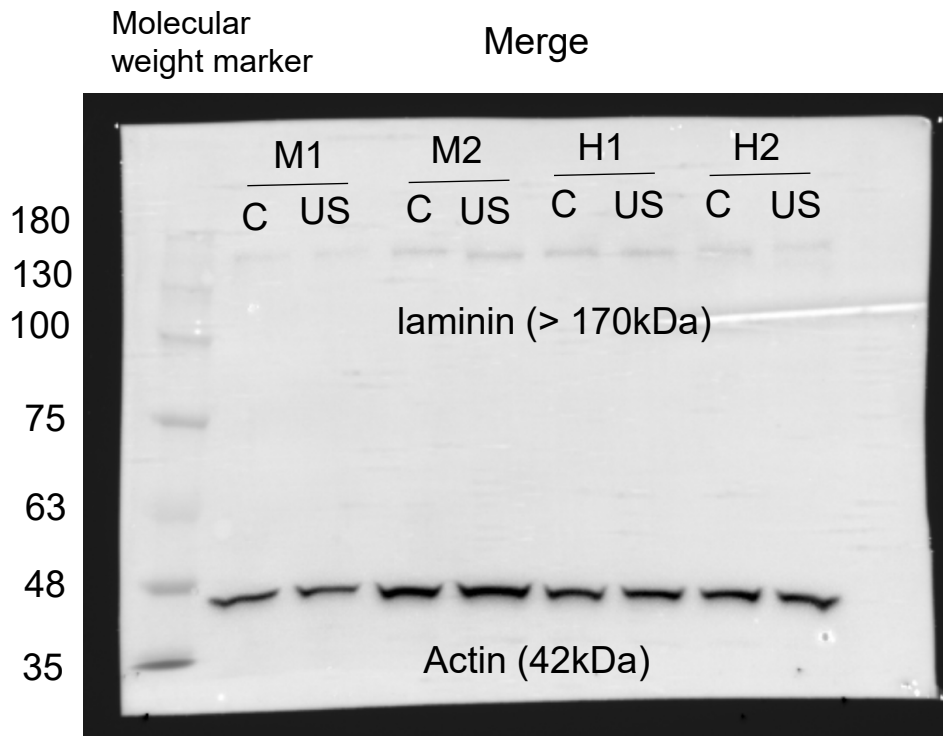

[Images acquired with Bio-Rad ChemiDoc™](#)

Samples: Mouse 1 (M1), Mouse 2 (M2), Human 1 (H1) and Human 2 (H2)  
under control conditions (C) or treated with ultrasound (US).

# INTEGRIN $\beta$ 1 WB (used in Figure 8 C)

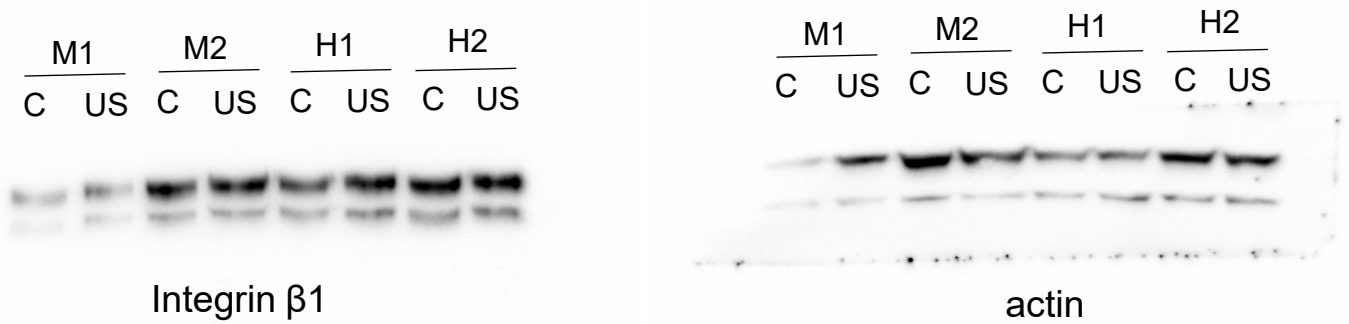

Integrin  $\beta$ 1

actin

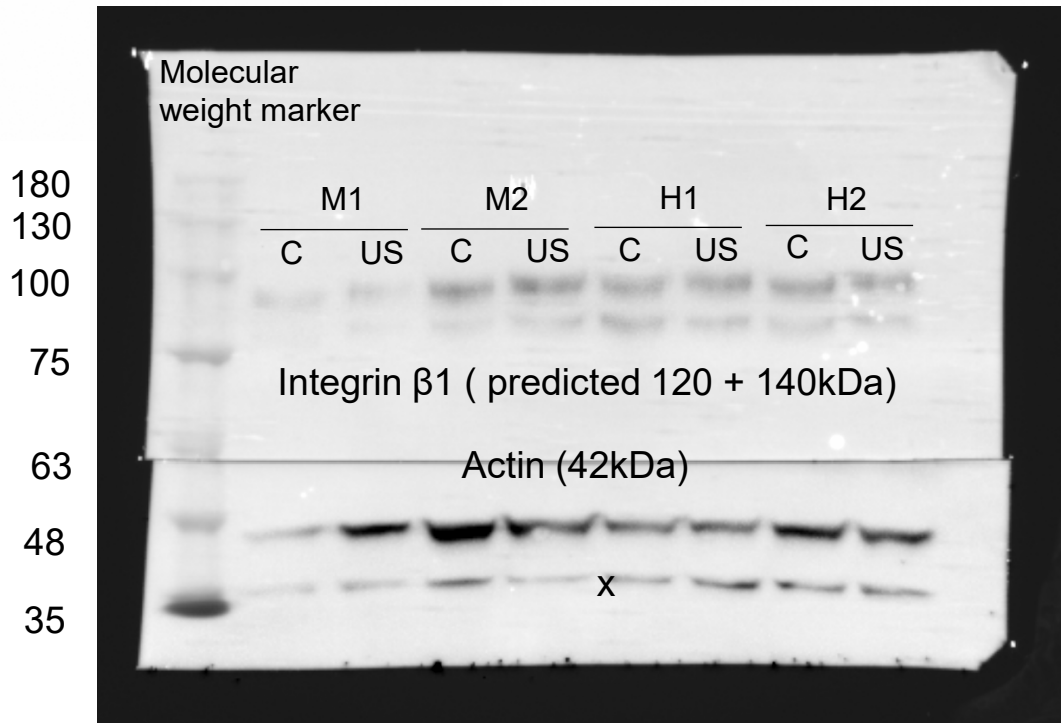

[Images acquired with Bio-Rad ChemiDoc™](#)

Samples: Mouse 1 (M1), Mouse 2 (M2), Human 1 (H1) and Human 2 (H2)  
under control conditions (C) or treated with ultrasound (US).
